# Supplementary material for: Hypomethylation of the Treg-Specific Demethylated Region in FOXP3 Is a Hallmark of the Regulatory T-cell Subtype in Adult T-cell Leukemia
Source: Oxford University Press journal article supplement (doi:10.1158/2326-6066.cir-15-0148), 2016-01-11
Supplement: 23266066cir150148-sup-151260_1_supp_3206323_nwzk09.doc [file 23266066cir150148-sup-151260_1_supp_3206323_nwzk09.doc]

**Supplementary Figure Legends**

**Supplementary Figure S1. Sorting strategy of primary ATL cells.**

Only live cells were gated. CD4high+CD3+ (or sometimes CD3dim) CD5+CD7-CD25+ ATL cells (upper panel) were sorted and both genomic DNA and RNA were collected. As CD4low+CD3+ T cells (lower panel) include CD5+CD7+CD25+ normal Tregs, we eliminated this fraction to avoid the contamination of normal Tregs.

**Supplementary** **Figure S2. Methylation status of *CTLA4* exon 2 and *HELIOS* intron 5.**

**(A)** DNA methylation status of *CTLA4* exon 2. **(B)** DNA methylation status of *HELIOS* intron 5.

**Supplementary** **Figure S3. Hypomethylation of the TSDR correlates with FOXP3 expression.**

**(A)** HTLV-1-infected cell lines were stained with FOXP3 antibody and the expression levels of FOXP3 were assessed by flow cytometry. Frequency of FOXP3-positive cells and mean fluorescence intensity (MFI) of FOXP3 were calculated and plotted. Each dot indicates individual cell line and bar indicates the median. **(B)** The *FOXP3* mRNA levels of HTLV-1-infected cell lines were assessed by quantitative RT-PCR method. The *FOXP3* mRNA level was divided by the *β-ACTIN* mRNA level. Relative mRNA levels were calculated based on the expression of mRNA level in the MJ cell line. Each dot indicates individual cell lines and bar indicates the median. **(C)** The *FOXP3* mRNA levels of primary sorted ATL cells were assessed by quantitative RT-PCR method. Bars indicate the median. Statistical analyses were performed and *P*-values were shown in the figure.

**Supplementary Figure S4. Comparison of other phenotypes of primary ATL cells by using flow cytometric analysis.**

**(A-F)** Primary ATL cells were stained with CD25 **(A)**, CTLA4 **(B)**, GITR **(C)**, CCR4 **(D)**, HELIOS **(E)** and Ki67 **(F)** antibody and the expression levels of each antibody were assessed by flow cytometry. Representative histogram data of each antibody was shown in left side. Case 13 and case 23 are representatives of the hypomethylated TSDR (Hypomethylation) and the methylated TSDR (Methylation), respectively. Mean fluorescence intensity or frequency of positive cells were calculated and plotted in the right side. Each dot represents individual ATL cells from each patient and bar indicates the median. Representative results of at least two independent experiments were shown. Statistical analyses were performed. NS indicates not statistically significant.

**Supplementary Figure S5. Analysis of cytokine secretion in primary ATL cells.**

**(A-F)** Primary ATL cells were stimulated with PMA and ionomycin. After fixation, cytokine secretion of IFN- **(A)**, IL-4 **(B)**, IL-17 **(C)**, IL-10 **(D)**, IL-2 **(E)** and TNF- **(F)** was analyzed. Red line indicates ATL cells and gray solid indicates isotype control of each antibody. Representative histogram of each cytokine was shown in left side. Case 3 and case 17 is representative of the hypomethylated TSDR (Hypomethylation) and the methylated TSDR (Methylation), respectively. Frequency of positive cells were shown in right side. Each dot represents individual ATL cells from each patient and bar indicates the median. Representative results of at least two independent experiments were shown. Statistical analyses were performed and NS indicates not statistically significant.

**Supplementary Figure S6. The mRNA expression level of CTLA4, HELIOS and EOS in primary ATL cells.**

The various mRNA expression levels in primary ATL cells were assessed by quantitative RT-PCR method. RNA samples from unsorted whole PBMC were included. Each dot indicates individual ATL cells and bar indicates the median. Bold circles and squares indicate sorted samples. Solid circles and squares indicate unsorted samples. **(A)** CTLA4. **(B)** HELIOS. **(C)** EOS. The mRNA levels of CTLA4, HELIOS, EOS were divided by the -ACTIN mRNA levels. Relative mRNA levels were calculated based on the expression of mRNA level in the MJ cell line. Statistical analyses were performed. *P*-values were indicated in each figure and NS indicates not statistically significant.

**Supplementary Figure S7. HTLV-1-infected cell lines with the hypomethylated TSDR showed suppressive function resembling Tregs.**

The suppressive function of HTLV-1-infected cell lines was assayed as shown in Figure 4. HTLV-1-infected cell lines MJ and ATL-43T were used as representatives of the hypomethylated TSDR and MT-1 and Hut102 were used as representatives of the methylated TSDR. Representative data of responder cells alone and HTLV-1-infected cell lines (MJ, ATL-43T, MT-1 and Hut102) added (top panel). The numbers indicate the frequency of proliferating responder cells. The percentage of proliferating responder cells (middle panel) and the numbers of proliferating cells (bottom panel) were plotted as mean ± standard deviation. Representative data were shown, as the experiments were independently performed three times with similar results. Statistical analyses were performed, * indicates statistically significant.

**Supplementary Figure S8. The methylation status of the TSDR did not correlate with *tax* or *HBZ* expression in primary ATL cells.**

The expression levels of the HTLV-1-associated-molecules, *tax* and *HBZ*, in primary ATL cells were assessed by quantitative RT-PCR method. RNA samples from unsorted whole PBMCs were included. Each dot indicates individual ATL cells, and bar indicates the median. The mRNA levels were divided by the 18S rRNA mRNA levels. The relative mRNA levels were calculated based on the mRNA level in the MJ cell line. (A) *tax*. (B) *HBZ*. Statistical analyses were performed. NS indicates not statistically significant.

**Supplementary Figure S9. Overall survival.**

(A) Survival curves of the hypomethylated TSDR group (solid line) and the methylated TSDR group (dotted line) were calculated by the Kaplan-Meier method. All patients, e.g., chronic and smoldering types were included in this analysis. (B,C) Survival curves of the Fraction II >20% (solid line) and Fraction II < 20% (dotted line) were calculated by the Kaplan-Meier method. The Fraction II >20% group indicates the frequency of CD45RA-FOXP3high T cells was higher than 20%, and the Fraction II < 20% group indicates CD45RA-FOXP3high T cells was lower than 20%. (B) Only male patients were included. (C) All patients, e.g., male and female were included. Statistical analyses were performed and *P*-values ware shown in the figure.

**Supplementary Figure S10. Subpopulation of FOXP3-positive ATL cells in female patients.**

The expressions of CD45RA and FOXP3 of primary ATL cells from female patients are shown. CD45RA: y-axis, FOXP3: x-axis. We analyzed total 14 cases. The representative data of a healthy individual is also shown. As mentioned in a previous study (16), Tregs can be divided into three groups according to their function: fractions I, II and III. Each square indicates fraction I (Fr I), fraction II (Fr II) and fraction III (Fr III), respectively. Numbers indicate the frequency of CD4+ Tcells in each fraction.
